# Supplementary material for: The Association Between Epigenetic Clocks and Physical Functioning in Older Women: A 3-Year Follow-up
Source: PubMed Central journal article supplement (PMC9373966; doi:10.1093/gerona/glab270), 2021-09-20
Supplement: glab270_suppl_supplementary_materials.pdf [file glab270_suppl_supplementary_materials.pdf]

## Supplementary material

### Standardized laboratory measurements of physical functioning

During the walk tests, the participants wore walking shoes or sneakers, and use of walking aids that they would normally require was allowed. The Timed Up and Go (TUG) test was used to assess the participants' mobility, balance, and walking ability.<sup>1-3</sup> The participants were verbally and visually instructed to rise from a chair, walk three meters, turn around, walk back to the chair, and sit down. The test was done twice, and the faster performance was documented as the result. In the 10-meter walk test, three meters were allowed for acceleration, and walking time over 10 meters was recorded in the laboratory corridor using photocells for timing.<sup>4, 5</sup> The participants were instructed to walk as fast as possible without compromising their safety. The test was conducted twice, and the faster performance was documented as the result. Aerobic performance was assessed using a validated six-minute walk test.<sup>6</sup> The participants were instructed to walk as fast as possible up and down a straight 50-m indoor track for six minutes without compromising their safety. The distance (m) covered in that time was recorded.

Maximal isometric muscle strength measurements were performed on the dominant side, in a sitting position, using an adjustable dynamometer chair (Good Strength, Metitur, Palokka, Finland). *Grip strength* was measured with a dynamometer fixed to the arm of the chair, with the elbow flexed at 90°. *Ankle plantar flexion strength* measured the ankle at an angle of 90°, fastened by a belt to a strain-gauge system. The leg was elevated to a horizontal position, and the knee was set at an angle of 20° from full extension. *Knee extension strength* was measured at a knee angle of 60° from full extension, with the ankle fastened by a belt to a strain-gauge system. After familiarization, three to five maximal efforts, separated by a one-minute rest, were conducted. For each subject and strength test, the best performance with the highest value was used in the analysis.

Supplemental figure 1 shows the Bland-Altman plot for agreement between chronological age and Horvath's DNAmAge. Average age measure difference was -1.71 years (std. err. 0.22,  $P < 0.001$ ). The Spearman correlation between mean and difference of the measurements was 0.53,  $P < 0.001$ . The figure shows that greater discrepancies between chronological and Horvath's DNAmAge are observed both for low and high measurement averages. For lower averages, Horvath's DNAmAge is higher than chronological age leading to negative differences, while for higher average values Horvath's DNAmAge is lower than chronological age (positive differences). The intraclass and concordance correlation coefficient estimates were moderate suggesting greater similarity between chronological and Horvath's DNAmAge.

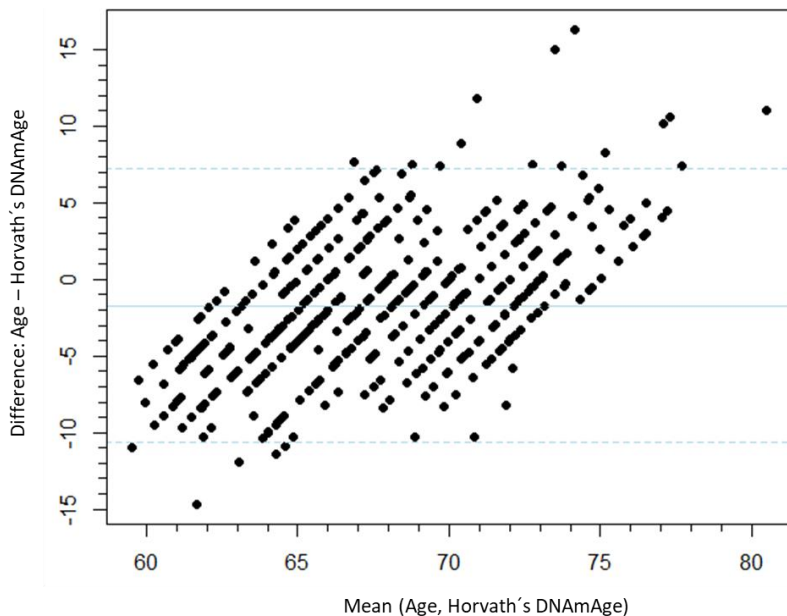

**Supplement Figure 1.** Bland-Altman plot for mean of chronological age and Horvath's DNAmAge against difference between chronological age and Horvath's DNAmAge (ICC = intraclass correlation coefficient for chronological age and Horvath's DNAmAge, CCC = concordance correlation coefficient for chronological age and Horvath's DNAmAge).

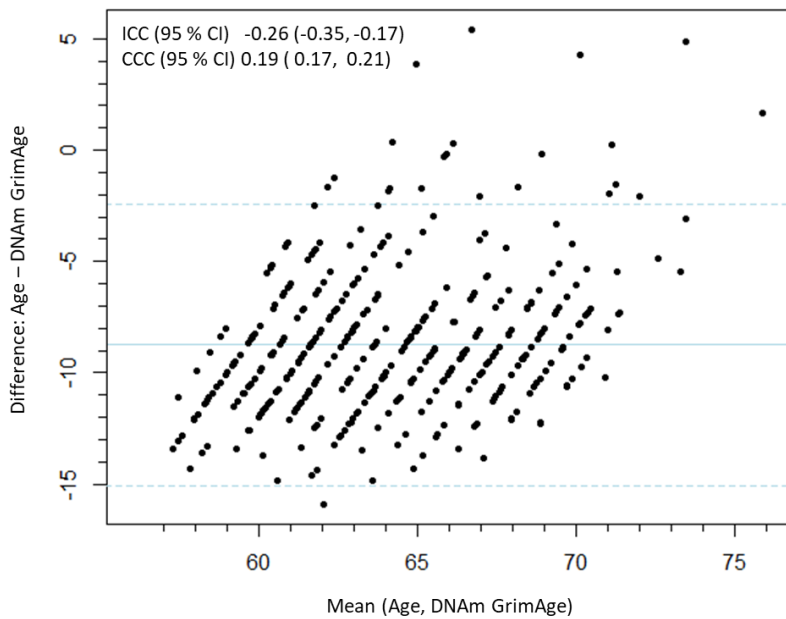

**Supplement Figure 2.** Bland-Altman plot for mean of chronological age and DNAm GrimAge against difference between chronological age and DNAm GrimAge (ICC = intraclass correlation coefficient for chronological age and DNAm GrimAge, CCC = concordance correlation coefficient for chronological age and DNAm GrimAge).

Supplemental figure 2 shows the Bland-Altman plot for agreement between chronological age and DNAm GrimAge. Average difference of the age measures was -8.75 years (std. err. 0.16,  $P < 0.001$ ). The Spearman correlation between mean and difference of the measurements was 0.27,  $P < 0.001$ . The figure shows that greater discrepancies between chronological and DNAm GrimAge are observed for higher average measurements. For higher age averages chronological age was markedly higher than DNAm GrimAge. The intraclass and concordance correlation coefficient estimates were low suggesting greater average difference for the chronological and DNAm GrimAge measures.

Supplementary Table 1. Unadjusted regression coefficient estimates, standard errors and uncorrected p-values for linear associations between PhenoAge and Hannum age acceleration and chronological age and body mass index and physical functioning phenotypes at baseline (N = 413) and at three-year follow-up (N = 298) among older women.

| Outcome                              | AgeAccel | Time point | Multiplier | Est.   | SE    | p                |
|--------------------------------------|----------|------------|------------|--------|-------|------------------|
| Body mass index (kg/m <sup>2</sup> ) | PhenoAge | baseline   | --         | 0.072  | 0.036 | <b>0.043</b>     |
|                                      |          | follow-up  | --         | 0.060  | 0.039 | 0.124            |
|                                      | Hannum   | baseline   | --         | 0.050  | 0.053 | 0.344            |
|                                      |          | follow-up  | --         | 0.070  | 0.054 | 0.198            |
|                                      | Age      | baseline   | --         | 0.003  | 0.082 | 0.975            |
|                                      |          | follow-up  | --         | 0.043  | 0.092 | 0.641            |
| Timed up and go (s)                  | PhenoAge | baseline   | 10         | 0.001  | 0.001 | 0.188            |
|                                      |          | follow-up  | 10         | 0.001  | 0.001 | 0.119            |
|                                      | Hannum   | baseline   | 10         | 0.001  | 0.001 | 0.274            |
|                                      |          | follow-up  | 10         | 0.001  | 0.001 | 0.239            |
|                                      | Age      | baseline   | 10         | 0.006  | 0.002 | <b>0.001</b>     |
|                                      |          | follow-up  | 10         | 0.007  | 0.002 | <b>&lt;0.001</b> |
| 10-meter walking test (s)            | PhenoAge | baseline   | --         | 0.000  | 0.000 | 0.412            |
|                                      |          | follow-up  | --         | 0.001  | 0.000 | 0.120            |
|                                      | Hannum   | baseline   | --         | 0.000  | 0.000 | 0.364            |
|                                      |          | follow-up  | --         | 0.001  | 0.001 | 0.073            |
|                                      | Age      | baseline   | --         | 0.003  | 0.001 | <b>&lt;0.001</b> |
|                                      |          | follow-up  | --         | 0.004  | 0.001 | <b>&lt;0.001</b> |
| Six-minute walking test (m)          | PhenoAge | baseline   | 1 / 1 000  | -0.001 | 0.001 | 0.368            |
|                                      |          | follow-up  | 1 / 1 000  | -0.001 | 0.001 | 0.082            |
|                                      | Hannum   | baseline   | 1 / 1 000  | -0.001 | 0.001 | 0.371            |
|                                      |          | follow-up  | 1 / 1 000  | -0.002 | 0.001 | 0.096            |
|                                      | Age      | baseline   | 1 / 1 000  | -0.007 | 0.002 | <b>&lt;0.001</b> |
|                                      |          | follow-up  | 1 / 1 000  | -0.010 | 0.002 | <b>&lt;0.001</b> |
| Grip strength (N)                    | PhenoAge | baseline   | 1 / 100    | -0.007 | 0.006 | 0.182            |
|                                      |          | follow-up  | 1 / 100    | -0.001 | 0.007 | 0.919            |
|                                      | Hannum   | baseline   | 1 / 100    | -0.002 | 0.007 | 0.793            |
|                                      |          | follow-up  | 1 / 100    | 0.013  | 0.007 | 0.051            |
|                                      | Age      | baseline   | 1 / 100    | -0.019 | 0.009 | <b>0.044</b>     |
|                                      |          | follow-up  | 1 / 100    | -0.039 | 0.012 | <b>0.001</b>     |
| Ankle plantar flexion strength (N)   | PhenoAge | baseline   | --         | -0.016 | 0.038 | 0.662            |
|                                      |          | follow-up  | --         | -0.015 | 0.040 | 0.697            |
|                                      | Hannum   | baseline   | --         | -0.054 | 0.056 | 0.339            |
|                                      |          | follow-up  | --         | -0.021 | 0.056 | 0.707            |
|                                      | Age      | baseline   | --         | -0.199 | 0.076 | <b>0.009</b>     |
|                                      |          | follow-up  | --         | -0.146 | 0.078 | 0.062            |

|                             |          |           |         |        |       |                  |
|-----------------------------|----------|-----------|---------|--------|-------|------------------|
| Knee extension strength (N) | PhenoAge | baseline  | 1 / 100 | 0.002  | 0.009 | 0.843            |
|                             |          | follow-up | 1 / 100 | -0.003 | 0.009 | 0.714            |
|                             | Hannum   | baseline  | 1 / 100 | 0.000  | 0.014 | 0.975            |
|                             |          | follow-up | 1 / 100 | -0.005 | 0.013 | 0.690            |
|                             | Age      | baseline  | 1 / 100 | -0.070 | 0.017 | <b>&lt;0.001</b> |
|                             |          | follow-up | 1 / 100 | -0.062 | 0.016 | <b>&lt;0.001</b> |

---

Note. Outcome values were scaled with the multiplier value. AgeAccel: DNA methylation age acceleration, Est: unadjusted regression coefficient, SE: standard error based on 10 000 bootstrap draws, *p*: expected false positive rate for a single test.

Supplementary Table 2. Adjusted regression coefficient estimates, standard errors and uncorrected p-values for linear associations between Grimage and Horvath age acceleration and chronological age and body mass index and physical functioning phenotypes at baseline (N = 413) and at three-year follow-up (N = 298) among older women.

| Outcome                              | AgeAccel | Time point | Multiplier | Adjusted for set 1 |       |                  | Adjusted for set 2 |       |                  |
|--------------------------------------|----------|------------|------------|--------------------|-------|------------------|--------------------|-------|------------------|
|                                      |          |            |            | Est.               | SE    | p                | Est.               | SE    | p                |
| Body mass index (kg/m <sup>2</sup> ) | GrimAge  | baseline   | --         | 0.088              | 0.086 | 0.305            | 0.065              | 0.086 | 0.447            |
|                                      |          | follow-up  | --         | 0.083              | 0.091 | 0.358            | 0.058              | 0.090 | 0.518            |
|                                      | Horvath  | baseline   | --         | 0.103              | 0.049 | <b>0.037</b>     | 0.102              | 0.050 | <b>0.039</b>     |
|                                      |          | follow-up  | --         | 0.087              | 0.053 | 0.096            | 0.088              | 0.053 | 0.098            |
|                                      | Age      | baseline   | --         | -0.003             | 0.082 | 0.970            | -0.024             | 0.084 | 0.777            |
|                                      |          | follow-up  | --         | 0.036              | 0.092 | 0.692            | 0.017              | 0.095 | 0.855            |
| Timed up and go (s)                  | GrimAge  | baseline   | 10         | 0.005              | 0.002 | <b>0.004</b>     | 0.004              | 0.002 | <b>0.011</b>     |
|                                      |          | follow-up  | 10         | 0.006              | 0.002 | <b>0.001</b>     | 0.005              | 0.002 | <b>0.003</b>     |
|                                      | Horvath  | baseline   | 10         | 0.000              | 0.001 | 0.764            | 0.001              | 0.001 | 0.549            |
|                                      |          | follow-up  | 10         | 0.000              | 0.001 | 0.995            | 0.000              | 0.001 | 0.777            |
|                                      | Age      | baseline   | 10         | 0.006              | 0.002 | <b>0.001</b>     | 0.004              | 0.002 | <b>0.013</b>     |
|                                      |          | follow-up  | 10         | 0.007              | 0.002 | <b>&lt;0.001</b> | -0.001             | 0.006 | 0.893            |
| 10-meter walking test (s)            | GrimAge  | baseline   | --         | 0.002              | 0.001 | <b>0.024</b>     | 0.001              | 0.001 | <b>0.050</b>     |
|                                      |          | follow-up  | --         | 0.003              | 0.001 | <b>&lt;0.001</b> | 0.003              | 0.001 | <b>0.001</b>     |
|                                      | Horvath  | baseline   | --         | -0.004             | 0.005 | 0.440            | 0.000              | 0.000 | 0.882            |
|                                      |          | follow-up  | --         | 0.001              | 0.000 | 0.235            | 0.001              | 0.000 | 0.174            |
|                                      | Age      | baseline   | --         | 0.003              | 0.001 | <b>&lt;0.001</b> | 0.002              | 0.001 | <b>0.002</b>     |
|                                      |          | follow-up  | --         | 0.004              | 0.001 | <b>&lt;0.001</b> | 0.003              | 0.002 | 0.129            |
| Six-minute walking test (m)          | GrimAge  | baseline   | 1 / 1 000  | -0.005             | 0.002 | <b>0.005</b>     | -0.004             | 0.002 | <b>0.010</b>     |
|                                      |          | follow-up  | 1 / 1 000  | -0.007             | 0.002 | <b>&lt;0.001</b> | -0.006             | 0.002 | <b>&lt;0.001</b> |
|                                      | Horvath  | baseline   | 1 / 1 000  | 0.000              | 0.001 | 0.957            | 0.000              | 0.001 | 0.828            |

|                                    |         |           |           |        |       |                  |        |       |              |
|------------------------------------|---------|-----------|-----------|--------|-------|------------------|--------|-------|--------------|
|                                    |         | follow-up | 1 / 1 000 | -0.001 | 0.001 | 0.362            | -0.001 | 0.001 | 0.258        |
|                                    | Age     | baseline  | 1 / 1 000 | -0.007 | 0.002 | <b>&lt;0.001</b> | -0.006 | 0.003 | <b>0.047</b> |
|                                    |         | follow-up | 1 / 1 000 | -0.010 | 0.002 | <b>&lt;0.001</b> | -0.010 | 0.004 | <b>0.013</b> |
| Grip strength (N)                  | GrimAge | baseline  | 1 / 100   | -0.012 | 0.010 | 0.226            | -0.009 | 0.009 | 0.331        |
|                                    |         | follow-up | 1 / 100   | -0.016 | 0.012 | 0.181            | -0.012 | 0.012 | 0.317        |
|                                    | Horvath | baseline  | 1 / 100   | -0.002 | 0.007 | 0.793            | -0.002 | 0.006 | 0.736        |
|                                    |         | follow-up | 1 / 100   | 0.013  | 0.007 | 0.051            | 0.013  | 0.007 | 0.061        |
|                                    | Age     | baseline  | 1 / 100   | -0.019 | 0.009 | <b>0.042</b>     | -0.016 | 0.009 | 0.087        |
|                                    |         | follow-up | 1 / 100   | -0.039 | 0.012 | <b>0.001</b>     | -0.036 | 0.012 | <b>0.002</b> |
| Ankle plantar flexion strength (N) | GrimAge | baseline  | --        | -0.145 | 0.074 | 0.051            | -0.135 | 0.074 | 0.068        |
|                                    |         | follow-up | --        | -0.193 | 0.088 | <b>0.028</b>     | -0.168 | 0.087 | 0.052        |
|                                    | Horvath | baseline  | --        | -0.044 | 0.056 | 0.433            | -0.039 | 0.055 | 0.477        |
|                                    |         | follow-up | --        | 0.037  | 0.059 | 0.537            | 0.036  | 0.059 | 0.548        |
|                                    | Age     | baseline  | --        | -0.199 | 0.076 | <b>0.009</b>     | -0.195 | 0.150 | 0.194        |
|                                    |         | follow-up | --        | -0.149 | 0.078 | 0.054            | -0.235 | 0.260 | 0.366        |
| Knee extension strength (N)        | GrimAge | baseline  | 1 / 100   | -0.033 | 0.019 | 0.076            | -0.028 | 0.018 | 0.115        |
|                                    |         | follow-up | 1 / 100   | -0.066 | 0.019 | <b>&lt;0.001</b> | -0.056 | 0.018 | <b>0.002</b> |
|                                    | Horvath | baseline  | 1 / 100   | 0.024  | 0.013 | 0.075            | 0.017  | 0.012 | 0.155        |
|                                    |         | follow-up | 1 / 100   | 0.012  | 0.012 | 0.319            | 0.005  | 0.011 | 0.619        |
|                                    | Age     | baseline  | 1 / 100   | -0.072 | 0.017 | <b>&lt;0.001</b> | -0.057 | 0.018 | <b>0.001</b> |
|                                    |         | follow-up | 1 / 100   | -0.063 | 0.016 | <b>&lt;0.001</b> | -0.048 | 0.036 | 0.183        |

Note. Covariate set 1 included smoking status, covariate set 2 included smoking status, alcohol consumption and number of chronic conditions. Outcome values were scaled with the multiplier value. Est: adjusted regression coefficient, SE: standard error based on 10 000 bootstrap draws, *p*: expected false positive rate for a single test.

Supplementary Table 3. Adjusted regression coefficient estimates, standard errors and uncorrected p-values for linear associations between PhenoAge and Hannum age acceleration and chronological age and body mass index and physical functioning phenotypes at baseline (N = 413) and at three-year follow-up (N = 298) among older women.

| Outcome                              | AgeAccel | Time point | Multiplier | Adjusted for set 1 |       |                  | Adjusted for set 2 |       |              |
|--------------------------------------|----------|------------|------------|--------------------|-------|------------------|--------------------|-------|--------------|
|                                      |          |            |            | Est.               | SE    | p                | Est.               | SE    | p            |
| Body mass index (kg/m <sup>2</sup> ) | PhenoAge | baseline   | --         | 0.071              | 0.036 | <b>0.047</b>     | 0.068              | 0.035 | 0.054        |
|                                      |          | follow-up  | --         | 0.059              | 0.039 | 0.129            | 0.054              | 0.038 | 0.154        |
|                                      | Hannum   | baseline   | --         | 0.050              | 0.053 | 0.350            | 0.040              | 0.053 | 0.454        |
|                                      |          | follow-up  | --         | 0.070              | 0.054 | 0.201            | 0.060              | 0.055 | 0.275        |
|                                      | Age      | baseline   | --         | -0.003             | 0.082 | 0.970            | -0.024             | 0.084 | 0.777        |
|                                      |          | follow-up  | --         | 0.036              | 0.092 | 0.692            | 0.017              | 0.095 | 0.855        |
| Timed up and go (s)                  | PhenoAge | baseline   | 10         | 0.001              | 0.001 | 0.203            | 0.001              | 0.001 | 0.165        |
|                                      |          | follow-up  | 10         | 0.001              | 0.001 | 0.129            | 0.001              | 0.001 | 0.116        |
|                                      | Hannum   | baseline   | 10         | 0.001              | 0.001 | 0.290            | 0.001              | 0.001 | 0.307        |
|                                      |          | follow-up  | 10         | 0.001              | 0.001 | 0.259            | 0.001              | 0.001 | 0.291        |
|                                      | Age      | baseline   | 10         | 0.006              | 0.002 | <b>0.001</b>     | 0.004              | 0.002 | <b>0.013</b> |
|                                      |          | follow-up  | 10         | 0.007              | 0.002 | <b>&lt;0.001</b> | -0.001             | 0.006 | 0.893        |
| 10-meter walking test (s)            | PhenoAge | baseline   | --         | 0.000              | 0.000 | 0.449            | 0.000              | 0.000 | 0.408        |
|                                      |          | follow-up  | --         | 0.001              | 0.000 | 0.125            | 0.001              | 0.000 | 0.126        |
|                                      | Hannum   | baseline   | --         | 0.000              | 0.000 | 0.384            | 0.000              | 0.000 | 0.487        |
|                                      |          | follow-up  | --         | 0.001              | 0.001 | 0.072            | 0.001              | 0.000 | 0.131        |
|                                      | Age      | baseline   | --         | 0.003              | 0.001 | <b>&lt;0.001</b> | 0.002              | 0.001 | <b>0.002</b> |
|                                      |          | follow-up  | --         | 0.004              | 0.001 | <b>&lt;0.001</b> | 0.003              | 0.002 | 0.129        |
| Six-minute walking test (m)          | PhenoAge | baseline   | 1 / 1 000  | -0.001             | 0.001 | 0.376            | -0.001             | 0.001 | 0.408        |
|                                      |          | follow-up  | 1 / 1 000  | -0.002             | 0.001 | 0.085            | -0.001             | 0.001 | 0.082        |
|                                      | Hannum   | baseline   | 1 / 1 000  | -0.001             | 0.001 | 0.377            | -0.001             | 0.001 | 0.569        |



|                                          |          |           |           |        |       |                  |        |       |              |
|------------------------------------------|----------|-----------|-----------|--------|-------|------------------|--------|-------|--------------|
|                                          |          | follow-up | 1 / 1 000 | -0.002 | 0.001 | 0.099            | -0.002 | 0.001 | 0.165        |
|                                          | Age      | baseline  | 1 / 1 000 | -0.007 | 0.002 | <b>&lt;0.001</b> | -0.006 | 0.003 | <b>0.047</b> |
|                                          |          | follow-up | 1 / 1 000 | -0.010 | 0.002 | <b>&lt;0.001</b> | -0.010 | 0.004 | <b>0.013</b> |
| Grip strength<br>(N)                     | PhenoAge | baseline  | 1 / 100   | -0.006 | 0.005 | 0.171            | -0.006 | 0.005 | 0.192        |
|                                          |          | follow-up | 1 / 100   | 0.005  | 0.005 | 0.314            | 0.007  | 0.005 | 0.184        |
|                                          | Hannum   | baseline  | 1 / 100   | -0.008 | 0.006 | 0.183            | -0.007 | 0.006 | 0.230        |
|                                          |          | follow-up | 1 / 100   | -0.001 | 0.007 | 0.915            | 0.000  | 0.007 | 0.952        |
|                                          | Age      | baseline  | 1 / 100   | -0.019 | 0.009 | <b>0.042</b>     | -0.016 | 0.009 | 0.087        |
|                                          |          | follow-up | 1 / 100   | -0.039 | 0.012 | <b>0.001</b>     | -0.036 | 0.012 | <b>0.002</b> |
| Ankle plantar<br>flexion strength<br>(N) | PhenoAge | baseline  | --        | -0.017 | 0.038 | 0.651            | -0.018 | 0.037 | 0.629        |
|                                          |          | follow-up | --        | -0.014 | 0.039 | 0.715            | -0.010 | 0.039 | 0.798        |
|                                          | Hannum   | baseline  | --        | -0.053 | 0.056 | 0.338            | -0.042 | 0.054 | 0.436        |
|                                          |          | follow-up | --        | -0.021 | 0.056 | 0.700            | -0.018 | 0.055 | 0.741        |
|                                          | Age      | baseline  | --        | -0.199 | 0.076 | <b>0.009</b>     | -0.195 | 0.150 | 0.194        |
|                                          |          | follow-up | --        | -0.149 | 0.078 | 0.054            | -0.235 | 0.260 | 0.366        |
| Knee extension<br>strength (N)           | PhenoAge | baseline  | 1 / 100   | 0.002  | 0.009 | 0.792            | -0.001 | 0.008 | 0.928        |
|                                          |          | follow-up | 1 / 100   | -0.003 | 0.009 | 0.748            | -0.005 | 0.008 | 0.587        |
|                                          | Hannum   | baseline  | 1 / 100   | 0.000  | 0.014 | 0.986            | -0.003 | 0.012 | 0.834        |
|                                          |          | follow-up | 1 / 100   | -0.005 | 0.013 | 0.698            | -0.007 | 0.012 | 0.561        |
|                                          | Age      | baseline  | 1 / 100   | -0.072 | 0.017 | <b>&lt;0.001</b> | -0.057 | 0.018 | <b>0.001</b> |
|                                          |          | follow-up | 1 / 100   | -0.063 | 0.016 | <b>&lt;0.001</b> | -0.048 | 0.036 | 0.183        |

Note. Covariate set 1 included smoking status, covariate set 2 included smoking status, alcohol consumption and number of chronic conditions. Outcome values were scaled with the multiplier value. Est: adjusted regression coefficient, SE: standard error based on 10 000 bootstrap draws,  $p$ : expected false positive rate for a single test.

Supplementary Table 4. Unadjusted estimates, standard errors, and uncorrected p-values for linear and quadratic effects of four age-acceleration measures and age on body mass index at baseline (N = 413) and at three-year follow-up (N = 298) among older women.

| AgeAccel         | Time point | Effect Component <sup>a</sup> | Unadjusted |       |              | Adjusted for set 1 |       |              | Adjusted for set 2 |       |              |
|------------------|------------|-------------------------------|------------|-------|--------------|--------------------|-------|--------------|--------------------|-------|--------------|
|                  |            |                               | Est.       | SE    | p            | Est.               | SE    | p            | Est.               | SE    | p            |
| GrimAge          | baseline   | Linear                        | 0.164      | 0.084 | 0.052        | 0.187              | 0.088 | <b>0.034</b> | 0.161              | 0.088 | 0.066        |
|                  |            | Quadratic                     | -0.033     | 0.014 | <b>0.018</b> | -0.029             | 0.014 | <b>0.042</b> | -0.028             | 0.014 | <b>0.041</b> |
|                  | follow-up  | Linear                        | 0.163      | 0.089 | 0.067        | 0.189              | 0.093 | <b>0.042</b> | 0.161              | 0.092 | 0.082        |
|                  |            | Quadratic                     | -0.036     | 0.014 | <b>0.009</b> | -0.032             | 0.014 | <b>0.026</b> | -0.031             | 0.014 | <b>0.026</b> |
| Horvath          | baseline   | Linear                        | 0.109      | 0.051 | <b>0.033</b> | 0.114              | 0.052 | <b>0.028</b> | 0.111              | 0.052 | <b>0.033</b> |
|                  |            | Quadratic                     | -0.005     | 0.007 | 0.449        | -0.005             | 0.007 | 0.446        | -0.004             | 0.007 | 0.542        |
|                  | follow-up  | Linear                        | 0.093      | 0.055 | 0.091        | 0.098              | 0.055 | 0.076        | 0.096              | 0.055 | 0.083        |
|                  |            | Quadratic                     | -0.004     | 0.007 | 0.561        | -0.005             | 0.007 | 0.545        | -0.003             | 0.008 | 0.650        |
| PhenoAge         | baseline   | Linear                        | 0.087      | 0.038 | <b>0.022</b> | 0.085              | 0.037 | <b>0.023</b> | 0.083              | 0.037 | <b>0.028</b> |
|                  |            | Quadratic                     | -0.008     | 0.004 | <b>0.036</b> | -0.008             | 0.004 | <b>0.040</b> | -0.009             | 0.004 | <b>0.029</b> |
|                  | follow-up  | Linear                        | 0.075      | 0.041 | 0.070        | 0.073              | 0.041 | 0.073        | 0.069              | 0.040 | 0.089        |
|                  |            | Quadratic                     | -0.008     | 0.008 | 0.072        | -0.008             | 0.004 | 0.081        | -0.008             | 0.004 | 0.063        |
| Hannum           | baseline   | Linear                        | 0.056      | 0.053 | 0.288        | 0.056              | 0.053 | 0.294        | 0.047              | 0.053 | 0.376        |
|                  |            | Quadratic                     | -0.006     | 0.008 | 0.459        | -0.006             | 0.008 | 0.475        | -0.008             | 0.008 | 0.337        |
|                  | follow-up  | Linear                        | 0.076      | 0.055 | 0.167        | 0.075              | 0.055 | 0.170        | 0.067              | 0.055 | 0.228        |
|                  |            | Quadratic                     | -0.008     | 0.008 | 0.367        | -0.007             | 0.008 | 0.378        | -0.009             | 0.008 | 0.274        |
| Age <sup>b</sup> | baseline   | Linear                        | -0.009     | 0.086 | 0.922        | 0.002              | 0.086 | 0.981        | -0.016             | 0.087 | 0.855        |
|                  |            | Quadratic                     | -0.011     | 0.027 | 0.702        | -0.009             | 0.027 | 0.744        | -0.014             | 0.028 | 0.612        |
|                  | follow-up  | Linear                        | 0.049      | 0.096 | 0.606        | 0.042              | 0.095 | 0.662        | 0.025              | 0.097 | 0.793        |
|                  |            | Quadratic                     | -0.012     | 0.031 | 0.706        | -0.010             | 0.031 | 0.746        | -0.015             | 0.031 | 0.641        |

Note. <sup>a</sup>Curvilinear age-acceleration and age associations modelled using second-degree polynomial:  $h + h^2$ , where  $h$  is the linear component and  $h^2$  is the quadratic component. <sup>b</sup>Age was centered. Covariate set 1 included smoking status, covariate set 2 included smoking status, alcohol consumption and number of chronic conditions. Est: adjusted regression coefficient, SE: standard error based on 10 000 bootstrap draws,  $p$ : expected false positive rate for a single test.

## REFERENCES

1. Podsiadlo D and Richardson S. "The timed 'Up & Go': A test of basic functional mobility for frail elderly persons". *J Am Geriatr Soc* 1991; 39(2): 142-148.
2. Collado-Mateo D, Domínguez-Muñoz F, Adsuar J, et al. Reliability of the Timed Up and Go Test in Fibromyalgia. *Rehabil Nur* 2018; 43(1): 35-39.
3. Hafsteinsdóttir TB, Rensink M and Schuurmans M. Clinimetric properties of the Timed Up and Go Test for patients with stroke: a systematic review. *Top Stroke Rehabil* 2014; 21(3): 197-210.
4. Tiainen K, Pajala S, Sipilä S, et al. Genetic effects in common on maximal walking speed and muscle performance in older women. *Scand J Med Sci Sports* 2007; 17(3): 274-280.
5. Sipilä S, Multanen J, Kallinen M, et al. Effects of strength and endurance training on isometric muscle strength and walking speed in elderly women. *Acta Physiol Scand* 1996; 156(4): 457-464.
6. Aniansson A, Rundgren A and Sperling L. Evaluation of functional capacity in activities of daily living in 70-year-old men and women. *Scand J Rehabil Med* 1980; 12(4): 145-154.
